# Supplementary material
Source: ML conference proceedings conference paper supplement (https://openaccess.thecvf.com/content/cvpr_2015/html/Wang_Video_Event_Recognition_2015_CVPR_paper.html)
Supplement: Supplementary file 1 [file Wang_Video_Event_Recognition_2015_CVPR_supplemental.pdf]

# Video Event Recognition with Deep Hierarchical Context Model

## - Supplementary Material

Xiaoyang Wang and Qiang Ji  
Dept. of ECSE, Rensselaer Polytechnic Institute, USA  
{wangx16, jiq}@rpi.edu

### 1. Deep Context Model

#### 1.1. Conditional Distributions of Different Units

Given the deep context model defined in the paper, we further provide the conditional distributions of different units given their adjacent units as:

$$P(h_{pi} = 1 | \mathbf{p}, \mathbf{h}_r) = \sigma(\sum_j W_{ji}^1 p_j / \sigma_{\mathbf{p}j} + \sum_k Q_{ik}^1 h_{rk} + b_{\mathbf{h}_p i}) \quad (1)$$

$$P(h_{oj} = 1 | \mathbf{o}, \mathbf{h}_r) = \sigma(\sum_i W_{ij}^2 o_i / \sigma_{\mathbf{o}i} + \sum_k Q_{jk}^2 h_{rk} + b_{\mathbf{h}_o j}) \quad (2)$$

$$P(h_{rk} = 1 | \mathbf{h}_p, \mathbf{h}_o, \mathbf{y}) = \sigma(\sum_i Q_{ik}^1 h_{pi} + \sum_j Q_{jk}^2 h_{oj} + \sum_{k'} L_{kk'} y_{k'} + b_{\mathbf{h}_r k}) \quad (3)$$

$$P(y_k = 1 | \mathbf{e}, \mathbf{c}, \mathbf{h}_r, \mathbf{h}_s, \mathbf{y}_{-1}) = \frac{\exp(\sum_f U_{fk}^1 \tilde{e}_f + \sum_{f'} U_{f'k}^2 \tilde{c}_{f'} + \sum_g L_{gk} h_{rg} + \sum_i T_{ik} h_{si} + \sum_j D_{jk} y_{-1,j} + b_{\mathbf{y}k})}{\sum_{k'} \exp(\sum_f U_{fk'}^1 \tilde{e}_f + \sum_{f'} U_{f'k'}^2 \tilde{c}_{f'} + \sum_g L_{gk'} h_{rg} + \sum_i T_{ik'} h_{si} + \sum_j D_{jk'} y_{-1,j} + b_{\mathbf{y}k'})} \quad (4)$$

$$P(y_{-1,j} = 1 | \mathbf{y}, \mathbf{m}_{-1}) = \frac{\exp(\sum_i F_{ij} m_{-1,i} + \sum_k D_{jk} y_k + b_{\mathbf{y}_{-1}j})}{\sum_{j'} \exp(\sum_i F_{ij'} m_{-1,i} + \sum_k D_{jk'} y_k + b_{\mathbf{y}_{-1}j'})} \quad (5)$$

$$P(m_{-1,j} = 1 | \mathbf{y}_{-1}) = \frac{\exp(\sum_i F_{ji} y_{-1,i} + b_{\mathbf{m}_{-1}j})}{\sum_{j'} \exp(\sum_i F_{ji'} y_{-1,i} + b_{\mathbf{m}_{-1}j'})} \quad (6)$$

$$P(h_{si} = 1 | \mathbf{y}, \mathbf{s}) = \sigma(\sum_j G_{ji} s_j / \sigma_{\mathbf{s}j} + \sum_k T_{ik} y_k + b_{\mathbf{h}_s i}) \quad (7)$$

$$P(\mathbf{p} | \mathbf{h}_p) = \prod_i \frac{1}{\sigma_{\mathbf{p}i} \sqrt{2\pi}} \exp\left(-\frac{p_i - b_{\mathbf{p}i} - \sigma_{\mathbf{p}i} \sum_j W_{ij}^1 h_{pj}}{2\sigma_{\mathbf{p}i}^2}\right) \quad (8)$$

$$P(\mathbf{o} | \mathbf{h}_o) = \prod_i \frac{1}{\sigma_{\mathbf{o}i} \sqrt{2\pi}} \exp\left(-\frac{o_i - b_{\mathbf{o}i} - \sigma_{\mathbf{o}i} \sum_j W_{ij}^2 h_{oj}}{2\sigma_{\mathbf{o}i}^2}\right) \quad (9)$$

$$P(\mathbf{e} | \mathbf{y}) = \prod_i \frac{1}{\sigma_{\mathbf{e}i} \sqrt{2\pi}} \exp\left(-\frac{e_i - b_{\mathbf{e}i} - \sigma_{\mathbf{e}i} \sum_j U_{ij}^1 y_j}{2\sigma_{\mathbf{e}i}^2}\right) \quad (10)$$

$$P(\mathbf{c} | \mathbf{y}) = \prod_i \frac{1}{\sigma_{\mathbf{c}i} \sqrt{2\pi}} \exp\left(-\frac{c_i - b_{\mathbf{c}i} - \sigma_{\mathbf{c}i} \sum_j U_{ij}^2 y_j}{2\sigma_{\mathbf{c}i}^2}\right) \quad (11)$$

$$P(\mathbf{s} | \mathbf{h}_s) = \prod_i \frac{1}{\sigma_{\mathbf{s}i} \sqrt{2\pi}} \exp\left(-\frac{s_i - b_{\mathbf{s}i} - \sigma_{\mathbf{s}i} \sum_j G_{ij} h_{sj}}{2\sigma_{\mathbf{s}i}^2}\right) \quad (12)$$

where  $\sigma(x) = 1/(1 + \exp(-x))$  is the logistic function. In Equation 4,  $y_k = 1$  would indicate the remaining units in  $\mathbf{y}$  to be zero since  $\mathbf{y}$  is defined through the 1-of- $\mathcal{K}$  coding scheme to indicate the class label for the current event sequence. The same rule is applied to Equation 5 and Equation 6. These conditional distributions are used in different phrase in the learning and inference of the model as discussed in the following.

## 1.2. Model Learning

Here, we given more details on the approximate learning of the proposed deep context model. Specifically, for estimating the data-dependent expectation, we replace the true posterior  $P(\mathbf{h}|\mathbf{v}; \theta)$  by the variational posterior  $Q(\mathbf{h}|\mathbf{v}; \boldsymbol{\mu})$ . The mean-field approximation assumes all the hidden units are fully factorized as:

$$Q(\mathbf{h}|\mathbf{v}; \boldsymbol{\mu}) = \left( \prod_i q(h_{pi}|\mathbf{v}) \right) \left( \prod_j q(h_{oj}|\mathbf{v}) \right) \left( \prod_k q(h_{rk}|\mathbf{v}) \right) \left( \prod_g q(h_{sg}|\mathbf{v}) \right) \quad (13)$$

where  $\boldsymbol{\mu} = \{\boldsymbol{\mu}_p, \boldsymbol{\mu}_o, \boldsymbol{\mu}_r, \boldsymbol{\mu}_s\}$  are the mean field variational parameters with  $q(h_i = 1) = \mu_i$ . The estimation then proceeds by finding the parameters  $\boldsymbol{\mu}$  that maximizes the variational lower bound of the log conditional likelihood for fixed  $\theta$ , which results in iteratively updating  $\boldsymbol{\mu}$  for different hidden units through the mean-field fixed point equations.

For estimating the model's expectation, we use the MCMC based stochastic approximation procedure. It first randomly initialize  $M$  Markov chains with samples of  $\{\mathbf{y}^{0,j}, \mathbf{h}_r^{0,j}, \mathbf{h}_p^{0,j}, \mathbf{h}_o^{0,j}, \mathbf{p}^{0,j}, \mathbf{o}^{0,j}, \mathbf{e}^{0,j}, \mathbf{c}^{0,j}, \mathbf{y}_{-1}^{0,j}, \mathbf{m}_{-1}^{0,j}, \mathbf{h}_s^{0,j}, \mathbf{s}^{0,j}\}_{j=1}^M$ . For each Markov chain  $j$  from 1 to  $M$ , the  $(t+1)$ th step samples  $\mathbf{y}^{t+1,j}, \mathbf{h}_r^{t+1,j}, \mathbf{h}_p^{t+1,j}, \mathbf{h}_o^{t+1,j}, \mathbf{p}^{t+1,j}, \mathbf{o}^{t+1,j}, \mathbf{e}^{t+1,j}, \mathbf{c}^{t+1,j}, \mathbf{y}_{-1}^{t+1,j}, \mathbf{m}_{-1}^{t+1,j}, \mathbf{h}_s^{t+1,j}, \mathbf{s}^{t+1,j}$  given the samples from the  $t$ th step as  $\mathbf{y}^{t,j}, \mathbf{h}_r^{t,j}, \mathbf{h}_p^{t,j}, \mathbf{h}_o^{t,j}, \mathbf{p}^{t,j}, \mathbf{o}^{t,j}, \mathbf{e}^{t,j}, \mathbf{c}^{t,j}, \mathbf{y}_{-1}^{t,j}, \mathbf{m}_{-1}^{t,j}, \mathbf{h}_s^{t,j}, \mathbf{s}^{t,j}$  by running a Gibbs sampler with conditional distributions given in Equations 1 to 12. The  $M$  sampled Markov particles are then used to estimate the model's expectation in the corresponding step of the model optimization.

## 1.3. Model Inference

The detailed algorithm for inferring the probability  $P(y_k = 1|\mathbf{e}, \mathbf{c}, \mathbf{p}, \mathbf{o}, \mathbf{s}, \mathbf{m}_{-1}; \theta)$  through Gibbs sampling is summarized in Algorithm 1.

---

**Algorithm 1:** Inference of  $P(y|\mathbf{e}, \mathbf{c}, \mathbf{p}, \mathbf{o}, \mathbf{s}, \mathbf{m}_{-1})$  with Gibbs sampling.

---

**Data:** the input observation vectors  $\mathbf{e}, \mathbf{c}, \mathbf{p}, \mathbf{o}, \mathbf{s}$ , and  $\mathbf{m}_{-1}$  for the query event sequence; model parameter set  $\theta$

**Result:**  $P(y_k = 1|\mathbf{e}, \mathbf{c}, \mathbf{p}, \mathbf{o}, \mathbf{s}, \mathbf{m}_{-1}; \theta)$  for  $k = 1, \dots, K$

**for**  $chain = 1 \rightarrow C$  **do**

Randomly initialize  $\mathbf{h}_p^0, \mathbf{h}_o^0$  and  $\mathbf{y}^0$ ;

**for**  $t = 0 \rightarrow T$  **do**

Sample  $\mathbf{h}_r^t$  given  $\mathbf{h}_p^t, \mathbf{h}_o^t$ , and  $\mathbf{y}^t$  with Equation 3;

Sample  $\mathbf{h}_p^{t+1}$  given  $\mathbf{h}_r^t$  and  $\mathbf{p}$  with Equation 1;

Sample  $\mathbf{h}_o^{t+1}$  given  $\mathbf{h}_r^t$  and  $\mathbf{o}$  with Equation 2;

Sample  $\mathbf{h}_s^{t+1}$  given  $\mathbf{y}^t$  and  $\mathbf{s}$  with Equation 7;

Sample  $\mathbf{y}_{-1}^{t+1}$  given  $\mathbf{y}^t$  and  $\mathbf{m}_{-1}$  with Equation 5;

Sample  $\mathbf{y}^{t+1}$  given  $\mathbf{h}_r^t, \mathbf{h}_s^{t+1}, \mathbf{y}_{-1}^{t+1}, \mathbf{e}$  and  $\mathbf{c}$  with Equation 4;

**end**

**end**

Collect the last  $T'$  samples of  $\mathbf{y}$  from each chain;

Calculate  $P(y|\mathbf{e}, \mathbf{c}, \mathbf{p}, \mathbf{o}, \mathbf{s}, \mathbf{m}_{-1})$  with the collected samples;

---
